# Supplementary material for: The Incidence of Acute Respiratory Infection Was Higher in the Older Adults with Lower Limb Fracture Who Receive Spinal Anesthesia Than Those Who Receive General Anesthesia
Source: MDPI journal article supplement (doi:10.3390/ijerph192114260), 2022-11-01
Supplement: s1 [file s1]

**Table S1.** ICD9 and ICD10 diagnosis codes of the medical comorbidities.

| <b>Diagnosis</b>                      | <b>ICD-9-CM</b> | <b>ICD-10-CM</b>                             |
|---------------------------------------|-----------------|----------------------------------------------|
| Hypertension                          | 401-405         | I10, I11, I12, I13, I15                      |
| Diabetes Mellitus                     | 250             | E10, E11, E13                                |
| Dyslipidemia                          | 272.X           | E78                                          |
| Chronic renal failure                 | 585.X           | N184, N185, N186, N189                       |
| Liver disease                         | 571.X           | K70, K73, K74, K754, K760, K769, K7581, K768 |
| Chronic obstructive pulmonary disease | 491,492,496     | J449                                         |

Abbreviations: ICD-9-CM: International Classification of Diseases, Ninth Revision, Clinical Modification; ICD-10-CM: International Classification of Diseases, Tenth Revision, Clinical Modification

**Table S2.** Risk Factors associated with the incidence of acute respiratory infection within postoperative 2 weeks ( $n = 45,032$ ).

| Risk factors associated with acute respiratory infection | Crude            |                | Adjusted         |                |
|----------------------------------------------------------|------------------|----------------|------------------|----------------|
|                                                          | OR (95% CI)      | <i>p</i> value | OR (95% CI)      | <i>p</i> value |
| Age group ( $\geq 80$ y/o vs. 60-80 y/o)                 | 1.12(1.01, 1.25) | 0.041*         | 1.04(0.93, 1.17) | 0.486          |
| Gender(Male vs. Female)                                  | 1.15(1.04, 1.28) | 0.008*         | 1.12(1.00, 1.25) | 0.050*         |
| Anesthesia(RA vs. GA)                                    | 1.31(1.17, 1.46) | <0.001*        | 1.28(1.14, 1.42) | <0.001*        |
| Hypertension vs. None                                    | 1.21(1.09, 1.35) | <0.001*        | 1.22(1.09, 1.37) | <0.001*        |
| Diabetes vs. None                                        | 0.90(0.79, 1.01) | 0.083          | 0.86(0.75, 1.01) | 0.055          |
| Dyslipidemia vs. None                                    | 1.00(0.87, 1.15) | 0.952          | 1.05(0.90, 1.21) | 0.553          |
| Liver disease vs. None                                   | 1.02(0.82, 1.28) | 0.838          | 1.03(0.82, 1.28) | 0.803          |
| Chronic renal failure vs. None                           | 0.92(0.72, 1.17) | 0.484          | 0.89(0.70, 1.14) | 0.351          |
| Chronic obstructive pulmonary disease vs. None           | 1.67(1.44, 1.94) | <0.001*        | 1.55(1.33, 1.81) | <0.001*        |

Data are presented as Hazard ratio (95% CI). \* $p$ -value < 0.05 was considered statistically significant after test.

**Table S3.** Subgroup comparative analysis of different age, gender, with or without any comorbidity, and with or without chronic obstructive pulmonary disease group associated with the incidence of acute respiratory infection within postoperative 2 weeks ( $n = 45,032$ ).

| Subgroup comparative analysis         | Crude OR (95% CI)<br>(SA vs. GA) | <i>p</i> Value | Adjusted OR (95% CI)<br>(SA vs. GA) | <i>p</i> Value | <i>P</i> for interaction |
|---------------------------------------|----------------------------------|----------------|-------------------------------------|----------------|--------------------------|
| Main Model                            | 1.31(1.17, 1.46)                 | <0.001*        | 1.28(1.14, 1.42)                    | <0.001*        |                          |
| Age group                             |                                  |                |                                     |                | 0.653                    |
| 60-80 y/o                             | 1.27(1.11, 1.45)                 | 0.001*         | 1.25(1.09, 1.43)                    | 0.001*         |                          |
| ≥80 y/o                               | 1.35(1.11, 1.64)                 | 0.002*         | 1.33(1.09, 1.61)                    | 0.004*         |                          |
| Gender                                |                                  |                |                                     |                | 0.984                    |
| Male                                  | 1.32(1.12, 1.56)                 | 0.001*         | 1.27(1.07, 1.50)                    | 0.005*         |                          |
| Female                                | 1.29(1.12, 1.49)                 | 0.001*         | 1.28(1.10, 1.48)                    | 0.001*         |                          |
| With any of comorbidity <sup>#</sup>  |                                  |                |                                     |                | 0.807                    |
| No                                    | 1.31(1.07, 1.60)                 | 0.009*         | 1.29(1.05, 1.58)                    | 0.015*         |                          |
| Yes                                   | 1.30(1.14, 1.48)                 | <0.001*        | 1.27(1.11, 1.45)                    | <0.001*        |                          |
| Chronic obstructive pulmonary disease |                                  |                |                                     |                | 0.661                    |
| No                                    | 1.30(1.15, 1.46)                 | <0.001*        | 1.29(1.14, 1.45)                    | <0.001*        |                          |
| Yes                                   | 1.22(0.90, 1.64)                 | 0.194          | 1.18(0.88, 1.59)                    | 0.272          |                          |

Multiple logistic regression model with adjustment for all baseline characteristics shown in Table 1. Data are presented as odds ratio (95% CI). \* $p$ -value < 0.05 was considered statistically significant after test. <sup>#</sup>cormorbidity: hypertension, diabetes mellitus, dyslipidemia, liver disease, chronic renal failure, or chronic obstructive pulmonary disease.
